# Supplementary material for: Controllable Synthesis of All Inorganic Lead Halide Perovskite Nanocrystals with Various Appearances in Multiligand Reaction System
Source: MDPI journal article supplement (doi:10.3390/nano9121751), 2019-12-09
Supplement: s1 [file s1]

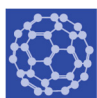

Article

# Controllable Synthesis of All Inorganic Lead Halide Perovskite Nanocrystals with Various Appearances in Multiligand Reaction System

Chen Chen <sup>1</sup>, Louwen Zhang <sup>2</sup>, Tielin Shi <sup>1,2</sup>, Guanglan Liao <sup>1,2</sup> and Zirong Tang <sup>1,\*</sup>

<sup>1</sup> State Key Laboratory of Digital Manufacturing Equipment and Technology, Huazhong University of Science and Technology (HUST), Wuhan 430074, China; chenchen\_@hust.edu.cn (C.C.); tlshi@mail.hust.edu.cn (T.S.); guanglan.liao@hust.edu.cn (G.L.)

<sup>2</sup> Wuhan National Laboratory for Optoelectronics, Huazhong University of Science and Technology (HUST), Wuhan 430074, China; d201780047@hust.edu.cn

\* Corresponding: zirong@hust.edu.cn; Tel: +8615827176117

Supplementary Materials for

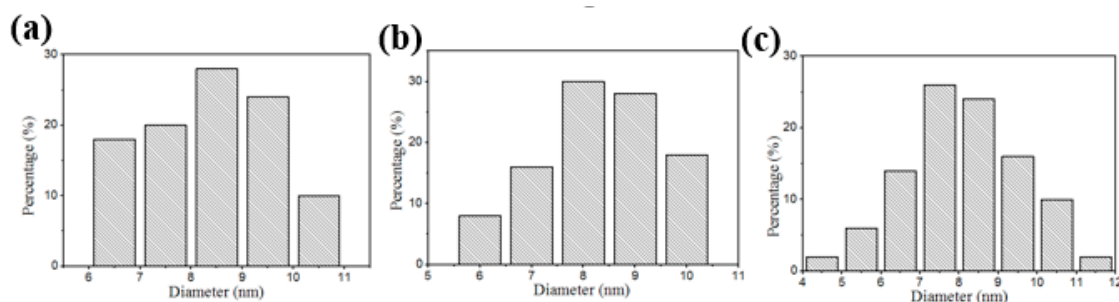

**Figure 1.** The size distribution of (a) CsPbCl<sub>3</sub>, (b) CsPbBr<sub>3</sub>, and (c) CsPbI<sub>3</sub> perovskite nanocrystals (PNCs) shown in Figure 1.

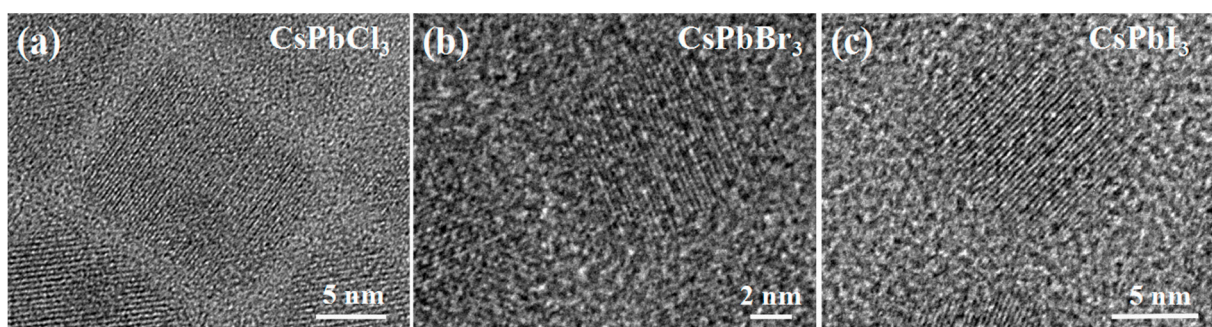

**Figure 2.** High-resolution TEM images of (a) CsPbCl<sub>3</sub>, (b) CsPbBr<sub>3</sub>, and (c) CsPbI<sub>3</sub> PNCs.

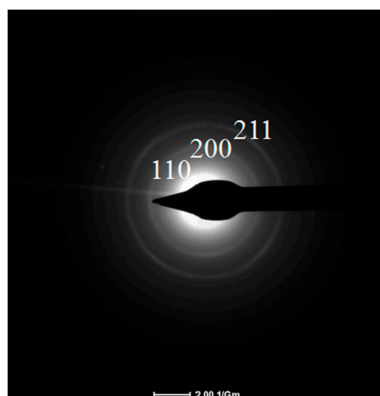

**Figure 3.** The selected area electron diffraction (SAED) patterns of CsPbBr<sub>3</sub> PNCs.

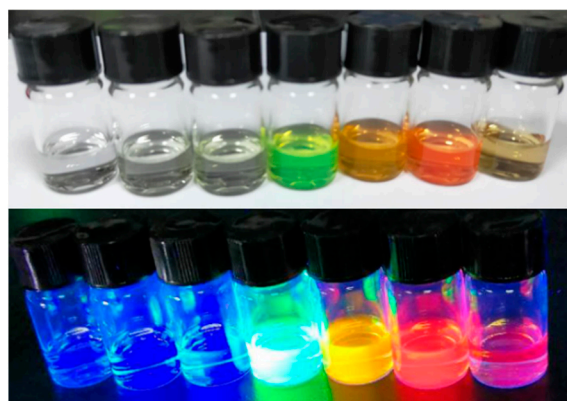

**Figure 4.** The photographs of the colloidal PNC solution covering the entire visible band under the room light (upper) and the ultraviolet lamp (bottom).

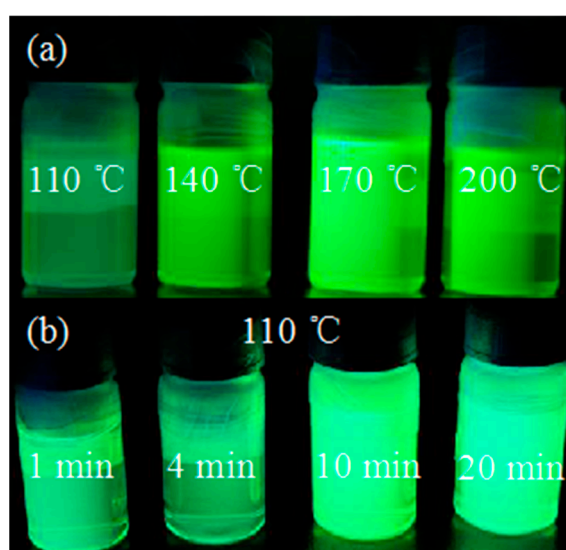

**Figure S5.** (a) The photographs of the colloidal PNC solution produced at different reaction temperatures under the UV irradiation. (b) The photographs of the colloidal PNC solution produced at 110 °C for different reaction times under the UV irradiation.

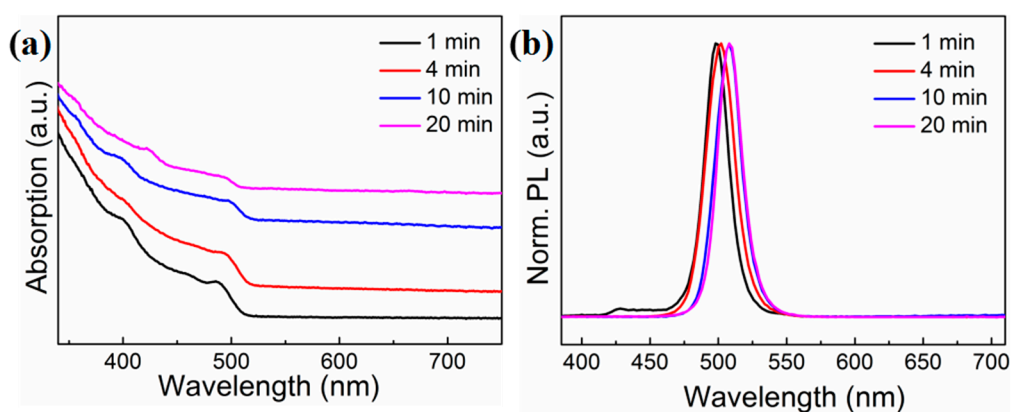

**Figure 6.** (a) Absorption spectra and (b) PL emission spectra of CsPbBr<sub>3</sub> PNCs prepared at 110 °C for different reaction times.

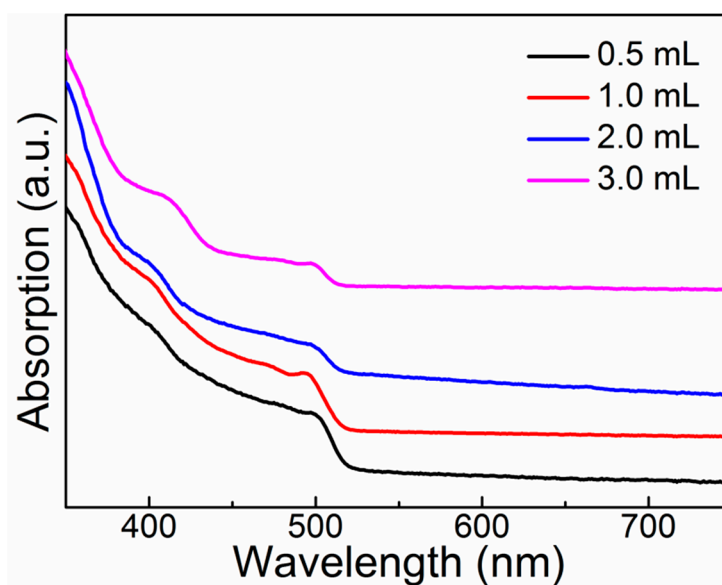

**Figure 7.** Absorption spectra of CsPbBr<sub>3</sub> PNCs prepared at 140 °C for 1 min using different amounts of oleamine (OAm).

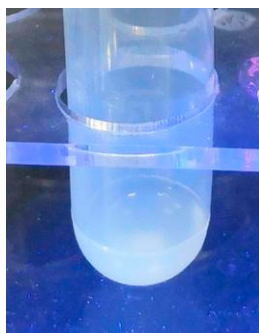

**Figure 8.** The photograph of the colloidal PNC solution produced by an excessive amount of OAm after storage in air for five days under the UV irradiation. This indicates that CsPbBr<sub>3</sub> PNCs are very unstable when the amount of OAm is excessive.

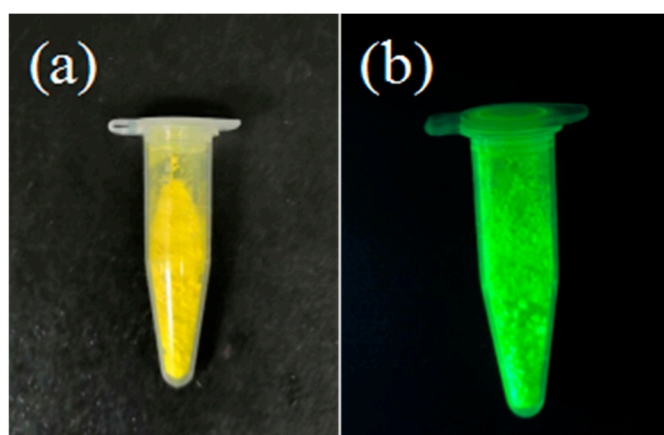

**Figure 9.** The images of the as-prepared CsPbBr<sub>3</sub> PNC powders. (a) Under the room light. (b) Under the radiation of 365 nm UV light.

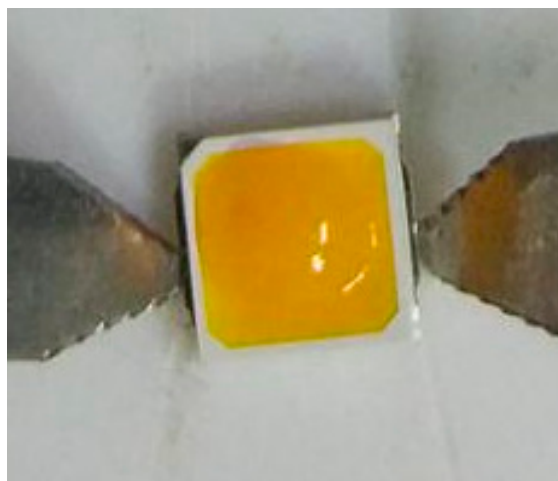

**Figure 10.** The image of the as-fabricated white light-emitting diode (WLED) device.

**Table 1.** PL QY of CsPbX<sub>3</sub> PNC solution with different reaction conditions.

| Sample              | Reaction temperature | Reaction time | PL QY |
|---------------------|----------------------|---------------|-------|
| CsPbBr <sub>3</sub> | 110 °C               | 4 min         | 52.8% |
| CsPbBr <sub>3</sub> | 140 °C               | 1 min         | 90.3% |
| CsPbBr <sub>3</sub> | 170 °C               | 30 s          | 96.9% |
| CsPbBr <sub>3</sub> | 200 °C               | 10 s          | 91.5% |
| CsPbBr <sub>3</sub> | 110 °C               | 10 min        | 78.8% |
| CsPbBr <sub>3</sub> | 110 °C               | 1 min         | 42.3% |
| CsPbI <sub>3</sub>  | 140 °C               | 1 min         | 62.4% |

**Table 2.** Fluorescence lifetime and average lifetime for CsPbCl<sub>3</sub>, CsPbBr<sub>3</sub>, and CsPbI<sub>3</sub> PNCs prepared using peanut oil.

| Sample              | $\tau_1$ (ns) | $\tau_2$ (ns) | P <sub>1</sub> (%) | P <sub>2</sub> (%) | $\tau_{ave}$ (ns) |
|---------------------|---------------|---------------|--------------------|--------------------|-------------------|
| CsPbCl <sub>3</sub> | 4.69          | 0.62          | > 99.99            | < 0.01             | 0.62              |
| CsPbBr <sub>3</sub> | 4.25          | 14.32         | 70.40              | 29.60              | 7.24              |
| CsPbI <sub>3</sub>  | 12.95         | 71.29         | 3.10               | 96.90              | 69.47             |

**Table 3.** Fluorescence lifetime and average lifetime for CsPbBr<sub>3</sub> PNCs prepared at different reaction temperature by using peanut oil.

| Reaction temperature (°C) | $\tau_1$ (ns) | $\tau_2$ (ns) | P <sub>1</sub> (%) | P <sub>2</sub> (%) | $\tau_{ave}$ (ns) |
|---------------------------|---------------|---------------|--------------------|--------------------|-------------------|
| 80                        | 2.46          | 8.52          | 90.52              | 9.48               | 3.03              |
| 110                       | 2.85          | 11.26         | 77.20              | 22.80              | 4.77              |
| 140                       | 3.84          | 13.39         | 69.98              | 30.02              | 6.71              |
| 170                       | 5.4           | 17.92         | 52.56              | 47.44              | 11.34             |
| 200                       | 3.44          | 15.35         | 74.17              | 25.83              | 6.52              |

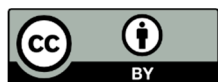

© 2019 by the authors. Submitted for possible open access publication under the terms and conditions of the Creative Commons Attribution (CC BY) license (<http://creativecommons.org/licenses/by/4.0/>).
